# Supplementary material
Source: PubMed Central journal article supplement (PMC3422635)
Supplement: NIHMS392521-supplement-01.pdf [file NIHMS392521-supplement-01.pdf]

**Supplemental FIGURE 1.** PKC- $\theta$  constitutively associates with SAP. Thymocytes from CD2-SAP transgenic mice were stimulated with anti-CD3 and lysed. PKC- $\theta$  immunoprecipitated with human SAP but not the Ig control. TCL: Total cell lysates.

**Supplemental FIGURE 2.** Isolated GST proteins used in this paper (numbers above GST and fusion protein lanes indicate the volume in microliters loaded on the gel).

**Supplemental FIGURE 3.** GFP, GFP-SAP, GFP-SAP(R78A) or GFP-SAP(R55L) were introduced into WT and *SAP*<sup>-/-</sup> CD4<sup>+</sup> T cells blasts via Amaxa. Representative example shown: top panel indicates cell size and bottom panel shows the percentage of GFP positive cells 4 h post-transfection.

**Supplemental Figure 4:** SAP associates with PKC- $\theta$  in the absence of Fyn. Thymocytes from WT and *Fyn*<sup>-/-</sup> mice were untreated or treated with *A*, 150  $\mu$ M PV or *B*, anti-CD3, lysed and GST pull downs immunoblotted for PKC- $\theta$ . TCL: Total cell lysates.

**Supplemental FIGURE 5.** CD2-SAP transgenic CD4<sup>+</sup> T cells produce elevated IL-4. *A*, SAP protein expression. Thymic and splenic cell lysates were immunoblotted for myc (transgenic SAP) and PKC- $\theta$  as a control. *B-C*, Thymocytes were assayed for (*B*) CD4 and CD8 expression (numbers in quadrants represent percentages of different cell populations) or (*C*) TCR $\beta$  chain expression on CD4 and CD8 single positive cells. *D-E*, RNA isolated from CD4<sup>+</sup> T cells stimulated with anti-CD3 + anti-CD28 for 24 and 48 h was subjected to (*D*) real-time quantitative RT-PCR analysis for *T-bet*, *c-Maf* and *GATA-3*, normalizing to  *$\beta_2m$*  message or (*E*) northern analyses, probing for GATA-3 and  $\beta_2M$ .

**Supplemental Figure 6.** Naïve CD2-SAP transgenic T cells demonstrate increased PKC- $\theta$  recruitment to the site of TCR engagement. *A-B*, WT and CD2-SAP CD4<sup>+</sup> T cell cells were incubated with latex beads coated with anti-MHC (3 $\mu$ g/ml) or anti-TCR (3 $\mu$ g/ml)  $\pm$  anti-CD28 (3 $\mu$ g/ml) and stained for (*A*) actin or (*B*) PKC- $\theta$  (representative example shown). Graphs represent the average percentage of cells scoring positive for enhanced staining at the site of T cell-bead interface, n=3 scoring a minimum of 30 bead conjugates each (\* denotes bead). *C-D*, Naïve AND CD4<sup>+</sup> T cell cells were permitted to conjugate to LPS-activated peptide pulsed B cells, then fixed and stained. Graphs represent the percentage of cells scoring positive for polarized (*C*) Lck or (*D*) PKC- $\theta$  (representative examples shown), n=3 scoring a minimum of 30 T: B cell conjugates (\* denotes B cell).

**Supplemental FIGURE 7.** PKC- $\theta$  retroviral constructs improve cytokine production from *PKC- $\theta$* <sup>-/-</sup> and *SAP*<sup>-/-</sup> CD4<sup>+</sup> T cells. *A*, Negatively selected naïve WT and *PKC- $\theta$* <sup>-/-</sup>

CD4<sup>+</sup> T cells were stimulated and infected with the indicated retrovirus, viable CD4<sup>+</sup> T cells isolated and restimulated to evaluate cytokine production by ELISA: left panel, IL-2 and right panel, IL-4. *B*, Negatively selected naïve WT and *SAP*<sup>-/-</sup> CD4<sup>+</sup> T cells were stimulated and infected with the indicated retrovirus, viable CD4<sup>+</sup> T cells isolated and restimulated to evaluate cytokine production by ELISA: left panel, IL-4 and right panel, IFN- $\gamma$ . *C*, WT OT-II and *SAP*<sup>-/-</sup> OT-II were retrovirally reconstituted with either Migr, Myr-PKC- $\theta$  or KA-PKC- $\theta$  in the presence of APC and peptide for 3 days. IL-2 expanded cells were sorted for GFP expression and rested for 24 h prior to B cell conjugation. Representative example shown: top panel indicates similar cell size while the bottom panel outlines GFP expression profiles.
